# Supplementary material for: hESCs‐Derived Early Vascular Cell Spheroids for Cardiac Tissue Vascular Engineering and Myocardial Infarction Treatment
Source: PubMed Central journal article supplement (PMC8948571; doi:10.1002/advs.202104299), 2022-01-29
Supplement: ADVS-9-2104299-s008.pdf [file ADVS-9-2104299-s008.pdf]

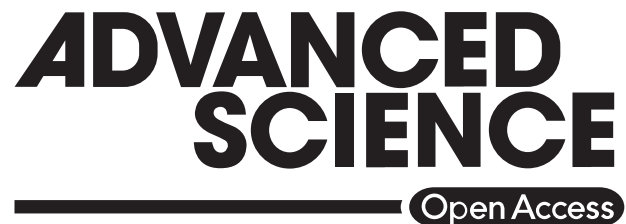

## Supporting Information

for *Adv. Sci.*, DOI 10.1002/adv.202104299

hESCs-Derived Early Vascular Cell Spheroids for Cardiac Tissue Vascular Engineering and Myocardial Infarction Treatment

*Yang Liu, Yifan Zhang, Tianxiao Mei, Hao Cao, Yihui Hu, Wenwen Jia, Jing Wang, Ziliang Zhang, Zhan Wang, Wenjun Le\* and Zhongmin Liu\**

## Supporting Information

for *Adv. Sci.*, DOI: 10.1002/advs.202104299

**hESCs-Derived Early Vascular Cell Spheroids for Engineering Vascularized Cardiac  
Tissues and Myocardial Infarction Treatment**

Yang Liu<sup>1,#</sup>, Yifan Zhang<sup>1,#</sup>, Tianxiao Mei<sup>1,2,#</sup>, Hao Cao<sup>3</sup>, Yihui Hu<sup>1</sup>, Wenwen Jia<sup>2</sup>, Jing Wang<sup>1</sup>, Ziliang Zhang<sup>1</sup>,  
Zhan Wang<sup>4</sup>, Wenjun Le<sup>1,\*</sup>, Zhongmin Liu<sup>1,2,3,\*</sup>

# Supporting Information

## **hESCs-Derived Early Vascular Cell Spheroids for Engineering Vascularized Cardiac Tissues and Myocardial Infarction Treatment**

Yang Liu<sup>1,#</sup>, Yifan Zhang<sup>1,#</sup>, Tianxiao Mei<sup>1,2,#</sup>, Hao Cao<sup>3</sup>, Yihui Hu<sup>1</sup>, Wenwen Jia<sup>2</sup>, Jing Wang<sup>1</sup>, Ziliang Zhang<sup>1</sup>, Zhan Wang<sup>4</sup>, Wenjun Le<sup>1,\*</sup>, Zhongmin Liu<sup>1,2,3,\*</sup>

<sup>1</sup> Institute for Regenerative Medicine, Shanghai East Hospital, Frontier Science Center for Stem Cell Research, School of Medicine, Tongji University, Shanghai 200092, China

<sup>2</sup> National Stem Cell Translational Resource Center, Shanghai East Hospital, School of Life Sciences and Technology, Tongji University, Shanghai, 200092, China

<sup>3</sup> Department of Cardiovascular Surgery, Shanghai East Hospital, Tongji University School of Medicine, Shanghai 200120, China

<sup>4</sup> Department of Internal Medicine, Section on Molecular Medicine, Wake Forest School of Medicine, Medical Center Blvd, Winston-Salem, NC 27157, USA

# These authors contributed equally to this work.

\* Correspondence: E-mail: liu.zhongmin@tongji.edu.cn, wenjunle@tongji.edu.cn

## Supplementary Tables

**Table S1: Primer sequences used for qPCR analysis**

| Genes                | Sequence of forward primer   | Sequence of reverse primer |
|----------------------|------------------------------|----------------------------|
| <i>cTnT</i>          | TTCACCAAAGATCTGCTCCTCGCT     | TTATTACTGGTGTGGAGTGGGTGTGG |
| <i>PECAMI</i>        | GACGTGCTGTTTTACAACATCTC      | CCTCACGATCCCACCTTGG        |
| <i>VE-cadherin</i>   | GACCGGGAGAATATCTCAGAGT       | CATTGAACAACCGATGCGTGA      |
| <i>Brachyury (T)</i> | AGTGAGCTGACAGGGTTGCT         | CCATTGGGAGTACCCAGGTT       |
| <i>KDR</i>           | ACTTTGGAAGACAGAACCAAATTATCTC | TGGGCACCATTCCACCA          |
| <i>CD34</i>          | AAATCCTCTTCCTCTGAGGCTGGA     | AAGAGGCAGCTGGTGATAAGGGTT   |
| <i>POU5F1</i>        | GCAATTTGCCAAGCTCCTGAA        | AAGCTAAGCTGCAGAGCCTCAAAG   |
| <i>NANOG</i>         | CAACTGGCCGAAGAATAGCAATG      | TGGTTGCTCCAGGTTGAATTGTT    |
| <i>GAPDH</i>         | TGCACCACCAACTGCTTAGC         | GGCATGGACTGTGGTCATGAG      |

## Supplementary Figures

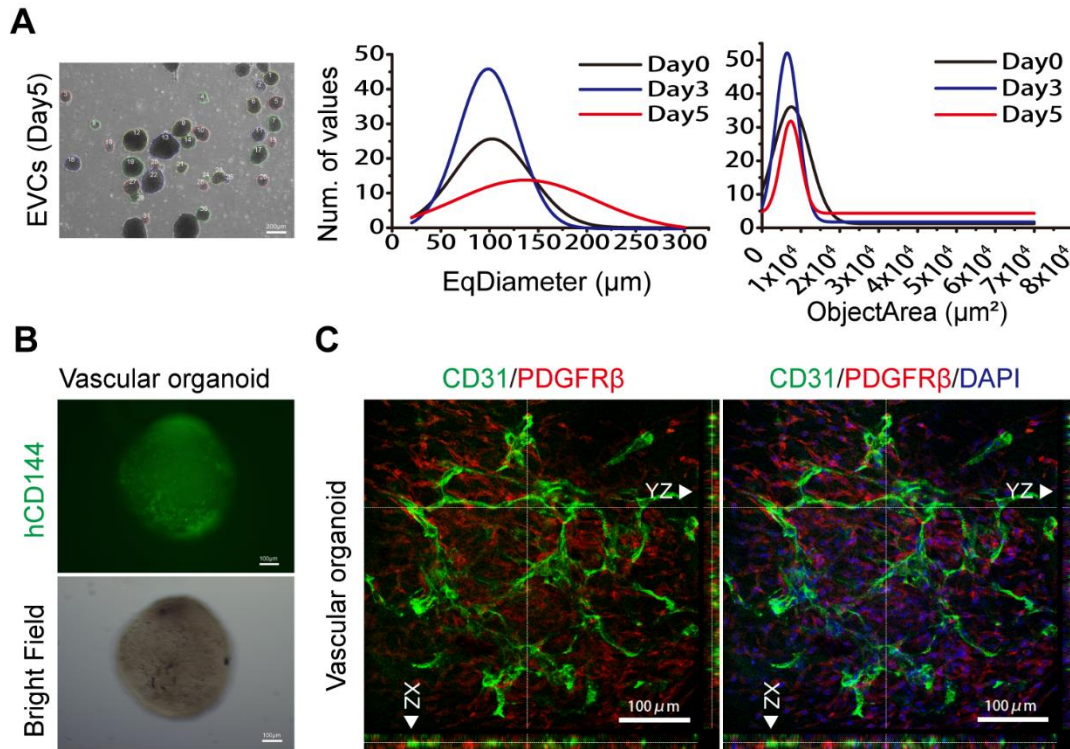

**Figure S1. Differentiation and fabrication of human vascular organoids from hESCs.** (A) Quantitative analysis of EB size at Day0, Day3 and Day5. Representative analytic results of EVCs at Day5 using NIS-Elements software were shown on the left. Scale bars, 100  $\mu\text{m}$ . Frequency distribution of equivalent diameter and objective area were analyzed and fitted by nonlinear regression with Gaussian equation using OriginPro 9.0 software. (B) Vital staining of human CD144-FITC in vascular organoid constructed from H9 hESCs. Scale bars, 100  $\mu\text{m}$ . (C) Immunofluorescence staining of CD31 and PDGFR $\beta$  in vascular organoid showed endothelial cells and pericytes are in close interconnection. Scale bars, 100  $\mu\text{m}$ . EB indicates embryoid body.

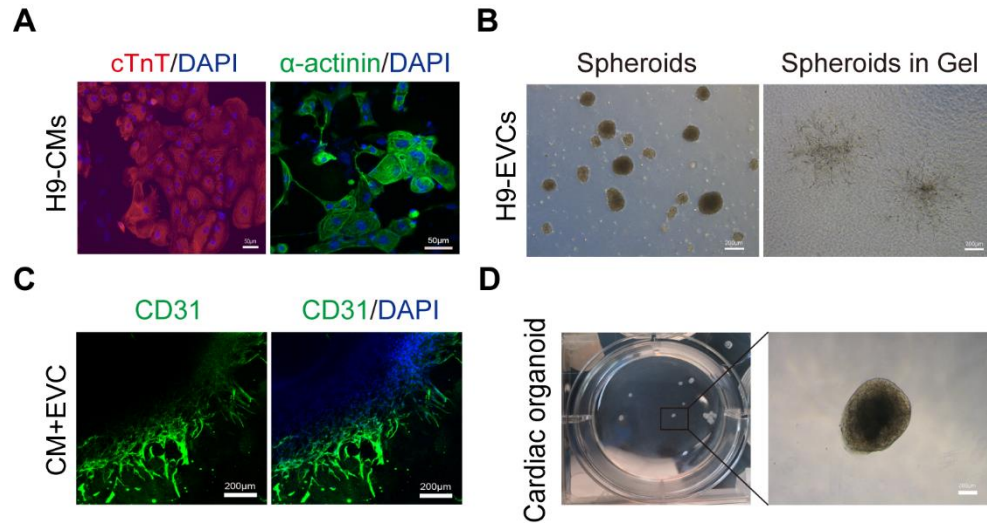

**Figure S2. Fabrication of cardiac microtissues by 3D co-culture of hESCs-derived vascular and cardiac cells.** (A) Immunofluorescence staining of cTnT and  $\alpha$ -actinin in CMs after lactate-based purification of cardiac differentiation from H9. Scale bars, 50  $\mu$ m. (B) Bright field images of aggregated spheroids with dissociated EVC single cells and sprouting detection after embedding in ECM hydrogel. Scale bars, 200  $\mu$ m. (C) IF staining of CD31 in spheroids of CMs and EVCs embedded in Collagen I-Matrigel matrix showed sprouting of endothelial cells. Scale bars, 200  $\mu$ m. (D) Bright field images of representative cardiac organoids with round and fully encapsulated morphology. Scale bars, 200  $\mu$ m. CM, cardiomyocytes; EVC, early vascular cell.

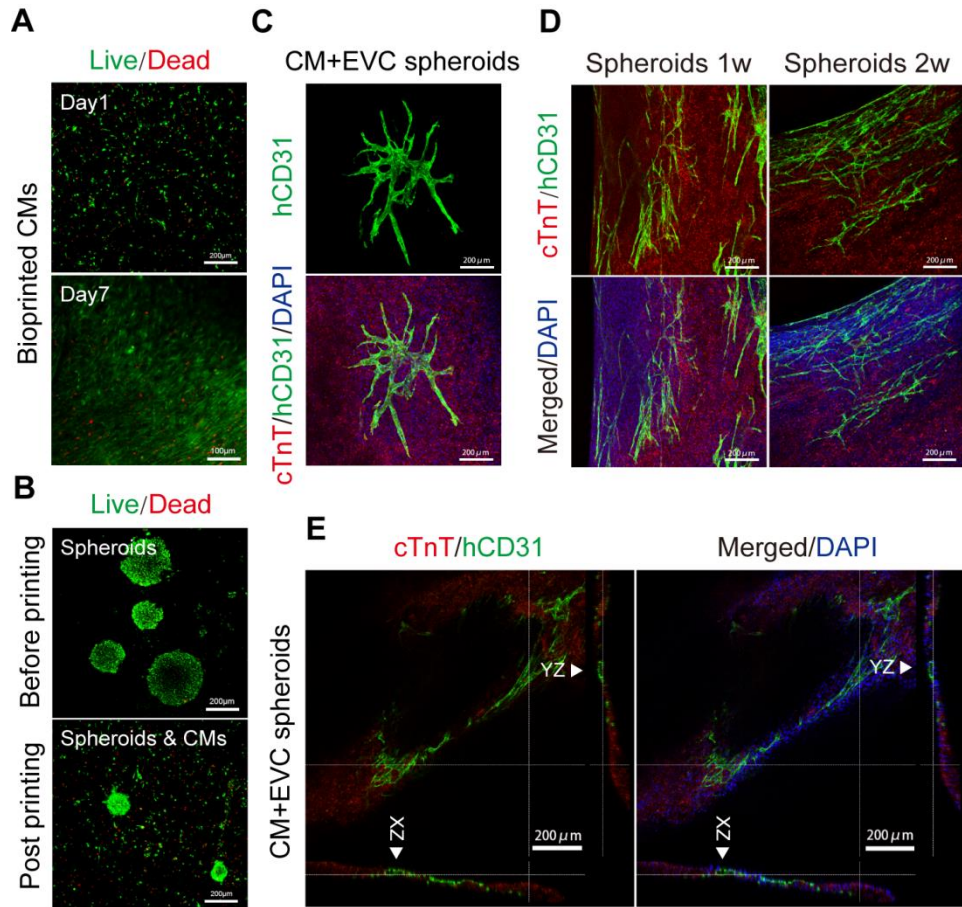

**Figure S3. Detection of human endothelial cells and vascular networks in 3D bioprinted cardiac patch.**

(A) AO-PI staining of bioprinted neonatal rat CMs in cardiac patches post-printing Day1 and Day7. Scale bars indicate 200  $\mu\text{m}$  and 100  $\mu\text{m}$ , respectively. (B) AO-PI staining of EVC spheroids before and after the bioprinting process. Scale bars, 200  $\mu\text{m}$ . (C) Immunofluorescence staining of cTnT and human CD31 in cardiac patches of CMs and EVC spheroids showed spider-like endothelial cell sprouting. Scale bars, 200  $\mu\text{m}$ . (D) IF staining of cTnT and human CD31 in cardiac patches with EVC spheroids and cultivated for 1 week and 2 weeks showed connected endothelial cells. Scale bars, 200  $\mu\text{m}$ . (E) Orthogonal projection of IF staining in 3D bioprinted cardiac patch with CMs and EVC spheroids showed vascular lumens enveloped by hCD31<sup>+</sup> endothelial cells have generated. Scale bars, 200  $\mu\text{m}$ . CM, cardiomyocytes; EVC, early vascular cell.

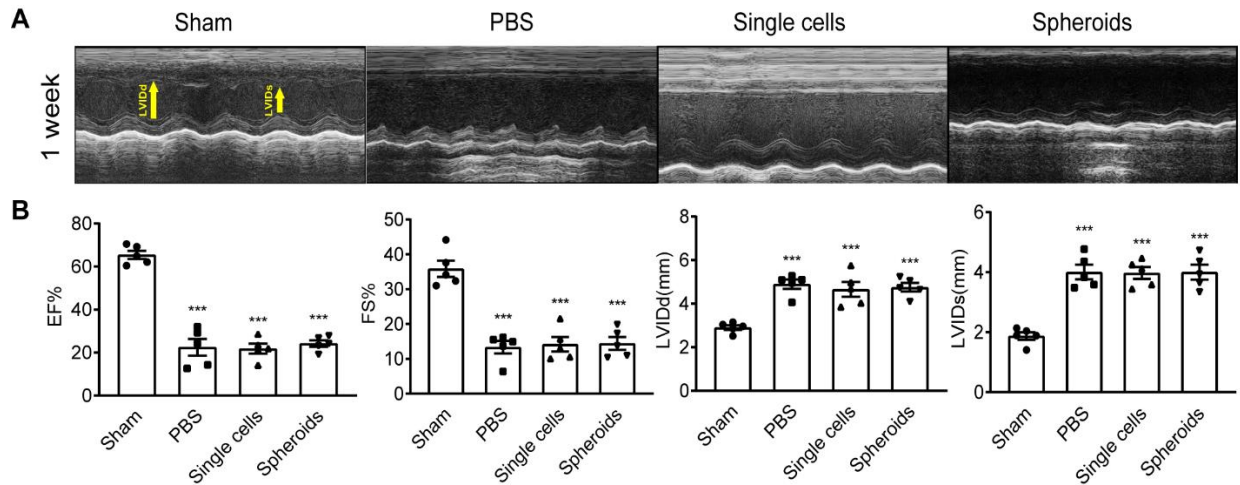

**Figure S4. Echocardiographic measurements of cardiac functions post-MI at 1 week.** (A) Representative images of echocardiography after MI for 1 week in different groups (n=5 mice per group). (B) Echocardiographic measurements of cardiac functions at 1 week post-MI and cell transplantation (n=5 mice per group). Data were shown as mean  $\pm$  SEM and analyzed using one-way ANOVA followed by Tukey's post-hoc analysis to show significance compared to sham group. Statistical significance was defined as  $P < 0.05$  (\*\*\*)  $P < 0.001$ , \*\*  $P < 0.01$  or \*  $P < 0.05$ ; ns means no significance). MI, myocardial infarction; EF, ejection fraction; FS, fractional shortening; LVIDd, left ventricular internal dimension-diastolic; LVIDs, left ventricular internal dimension-systolic.



## **Supplementary Movies**

**Movie S1:** 3D reconstitution of immunofluorescence staining of vascular organoid derived from H9 hESCs. Vascular endothelial cells positive for CD31 were stained as green and cell nucleus were stained as blue.

**Movie S2:** Day 12 CMs derived from H9 hESCs induced by monolayer-based method show spontaneous beating (10×).

**Movie S3:** Cell aggregates of CMs co-cultured with EVCs show spontaneous beating after embedding in ECM hydrogel, note the evident sprouting of cell aggregates (10×).

**Movie S4:** Video from microscope in bright field shows the spontaneous beating of an extracted and encapsulated vascularized cardiac organoid (10×).

**Movie S5:** Confocal stacks of vascular networks in cardiac tissues. Vascular endothelial cells positive for human CD31 were stained as green and rat CMs were stained as red (10×).

**Movie S6:** Representative video showing the spontaneous beating of 3D bioprinted cardiac patch with neonatal rat CMs only. Scale bars, 100 μm.

**Movie S7:** Representative video showing the spontaneous beating of 3D bioprinted cardiac patch with neonatal rat CMs and EVC spheroids. Scale bars, 100 μm.

**Movie S8:** Calcium imaging analysis shows synchronization contraction of 3D bioprinted cardiac patch with neonatal rat CMs only. Scale bars, 100 μm.

**Movie S9:** Calcium imaging analysis shows synchronization contraction of 3D bioprinted cardiac patch with neonatal rat CMs and EVC spheroids. Scale bars, 100 μm.
